# Supplementary material for: Contributions of vehicular carbonaceous aerosols to PM 2.5 in a roadside environment in Hong Kong
Source: Copernicus journal article supplement (doi:10.5194/acp-14-9279-2014), 2014-09-09
Supplement: Supplementary file 1 [file acp-14-9279-2014-supplement.pdf]

Supplement of Atmos. Chem. Phys., 14, 9279–9293, 2014  
<http://www.atmos-chem-phys.net/14/9279/2014/>  
doi:10.5194/acp-14-9279-2014-supplement  
© Author(s) 2014. CC Attribution 3.0 License.

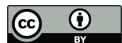

*Supplement of*

## **Contributions of vehicular carbonaceous aerosols to PM<sub>2.5</sub> in a roadside environment in Hong Kong**

**X. H. H. Huang et al.**

*Correspondence to:* J. Z. Yu (jian.yu@ust.hk)

## Supplementary material for

### Contributions of vehicular carbonaceous aerosols to PM<sub>2.5</sub> in a roadside environment in Hong Kong

X. H. Hilda Huang<sup>1</sup>, Q. J. Bian<sup>2,‡</sup>, Peter K. K. Louie<sup>3</sup>, and Jian Zhen Yu<sup>1,2,\*</sup>

<sup>1</sup>Institute for the Environment, <sup>2</sup>Department of Chemistry, Hong Kong University of Science & Technology, Clear Water Bay, Kowloon, Hong Kong, China

<sup>3</sup>Hong Kong Environmental Protection Department, 47/F, Revenue Tower, 5 Gloucester Road, Wan Chai, Hong Kong, China

\*Corresponding author. *Tel:* (852) 2358 7389, *Fax:* (852) 2358 1594, *Email:* jian.yu@ust.hk

‡Currently at Department of Atmospheric Science, Colorado State University, USA

This supplementary document contains one appendix, three tables and five figures.

**Appendix 1.** Equations to calculate % $\overline{RB}$  and % $\overline{RSD}$

**Table S1.** Temperature program used for RT-OCEC analysis.

**Table S2.** Sampling duration, data capture rates and valid rates for individual month during May 2011–April 2012 at MK AQMS.

**Table S3.** The 1-hr average OC and EC concentrations in individual sampling months and the monthly average OC and EC contributions to the PM<sub>2.5</sub> mass at MK AQMS during the study period from May 2011 to April 2012.

**Figure S1.** Diurnal variations of OC ( $\mu\text{gC}/\text{m}^3$ ) for weekdays, Saturdays and holidays at MK AQMS during the study period.

**Figure S2.** Diurnal variations of EC ( $\mu\text{gC}/\text{m}^3$ ) for weekdays, Saturdays and holidays at MK AQMS during the study period.

**Figure S3.** The diurnal variation of averaged OC/EC ratios.

**Figure S4.** Regression lines of 5% lowest (OC/EC) data ( $n = 38$ ) for January 2011 by ordinary least squares (OLS), default Deming, and optimal Deming regression.

**Figure S5.** Deming regression results of the lowest 5% summer data by OC-to-EC ratio and all summer data.

**Appendix 1.** Equations to calculate  $\% \overline{RB}$  and  $\% \overline{RSD}$

$$\overline{C}_i = \frac{X_i + Y_i}{2} \quad (1)$$

$$\%RB_i = \frac{(Y_i - X_i) \times 100\%}{\overline{C}_i} \quad (2)$$

$$\% \overline{RB} = \frac{1}{n} \sum_{i=1}^n \frac{(Y_i - X_i) \times 100\%}{\overline{C}_i} \quad (3)$$

$$\%RSD_i = \frac{|\%RB_i|}{\sqrt{2}} \quad (4)$$

$$\% \overline{RSD} = \sqrt{\frac{1}{n} \sum_{i=1}^n \%RSD_i^2} \quad (5)$$

where the  $x$  and  $y$  are the comparative concentration values from different datasets and  $n$  is the total number of samples.

**Table S1.** Temperature program used for RT-OCEC analysis.

| Gas               | Temperature, °C | Hold Time, s |
|-------------------|-----------------|--------------|
| He                | room temp.      | 10           |
| He                | 600             | 95           |
| He                | 840             | 90           |
| He                | no heat         | 30           |
| He/O <sub>2</sub> | 550             | 35           |
| He/O <sub>2</sub> | 650             | 45           |
| He/O <sub>2</sub> | 870             | 110          |
| CalGas            | no heat         | 120          |

**Table S2.** Sampling duration, data capture rates and valid rates for individual month during May 2011–April 2012 at MK AQMS.

| Month     | No. of hours | No. of samples collected | Data capture rate, % | Data valid rate, % |
|-----------|--------------|--------------------------|----------------------|--------------------|
| May 2011  | 744          | 735                      | 98.8                 | 90.5               |
| Jun. 2011 | 720          | 461                      | 64.0                 | 97.0               |
| Jul. 2011 | 744          | 265                      | 35.6                 | 86.8               |
| Aug. 2011 | 744          | 518                      | 69.6                 | 91.7               |
| Sep. 2011 | 720          | 713                      | 99.0                 | 98.9               |
| Oct. 2011 | 744          | 738                      | 99.2                 | 98.1               |
| Nov. 2011 | 720          | 713                      | 99.0                 | 99.3               |
| Dec. 2011 | 744          | 727                      | 97.7                 | 97.2               |
| Jan. 2012 | 744          | 738                      | 99.2                 | 99.2               |
| Feb. 2012 | 696          | 688                      | 98.9                 | 99.3               |
| Mar. 2012 | 744          | 735                      | 98.8                 | 90.1               |
| Apr. 2012 | 720          | 706                      | 98.1                 | 98.0               |

**Table S3.** The 1-hr average OC and EC concentrations in individual sampling months and the monthly average OC and EC contributions to the PM<sub>2.5</sub> mass at MK AQMS during the study period from May 2011 to April 2012.

| Month     | OC, $\mu\text{gC}/\text{m}^3$ | EC, $\mu\text{gC}/\text{m}^3$ | OC/PM <sub>2.5</sub> | EC/PM <sub>2.5</sub> |
|-----------|-------------------------------|-------------------------------|----------------------|----------------------|
| May 2011  | 7.1<br>(2.2–24.8)             | 4.9<br>(0.5–15.3)             | 20.8%                | 14.2%                |
| Jun. 2011 | 3.8<br>(0.7–13.2)             | 3.8<br>(0.3–13.8)             | 17.7%                | 17.7%                |
| Jul. 2011 | 3.5<br>(0.6–10.0)             | 4.0<br>(0.3–9.8)              | 15.5%                | 17.6%                |
| Aug. 2011 | 4.3<br>(0.6–14.3)             | 4.1<br>(0.2–12.0)             | 15.8%                | 15.3%                |
| Sep. 2011 | 6.2<br>(1.2–15.2)             | 4.4<br>(0.3–11.7)             | 16.8%                | 11.8%                |
| Oct. 2011 | 7.8<br>(1.7–16.2)             | 4.4<br>(0.5–12.8)             | 19.8%                | 11.3%                |
| Nov. 2011 | 8.0<br>(0.9–35.2)             | 4.6<br>(0.2–14.1)             | 23.2%                | 13.5%                |
| Dec. 2011 | 13.6<br>(4.3–30.5)            | 4.5<br>(0.2–16.6)             | 27.5%                | 9.2%                 |
| Jan. 2012 | 10.8<br>(3.2–23.6)            | 4.2<br>(0.2–10.2)             | 29.3%                | 11.3%                |
| Feb. 2012 | 9.0<br>(2.0–23.9)             | 4.1<br>(0.2–20.4)             | 29.3%                | 13.3%                |
| Mar. 2012 | 7.3<br>(1.9–16.1)             | 4.3<br>(0.2–12.7)             | 21.2%                | 12.4%                |
| Apr. 2012 | 6.7<br>(1.5–24.3)             | 4.6<br>(0.4–16.2)             | 19.4%                | 13.3%                |

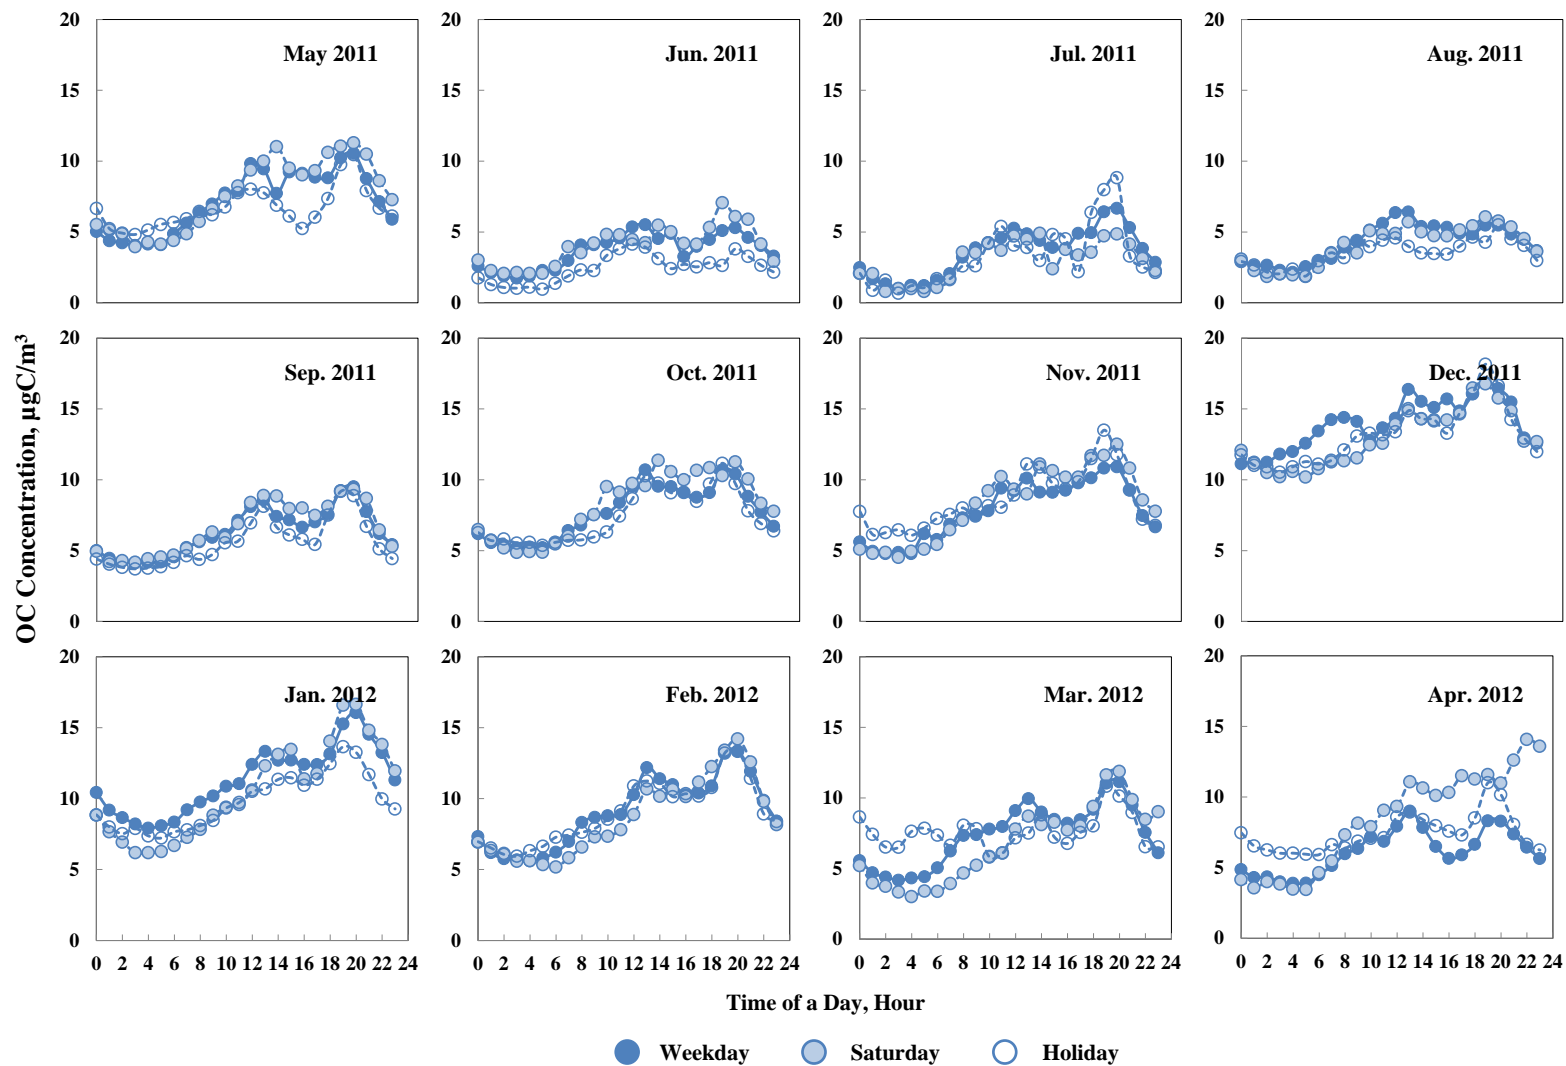

**Figure S1.** Diurnal variations of OC ( $\mu\text{gC}/\text{m}^3$ ) for weekdays, Saturdays and holidays at MK AQMS during the study period.

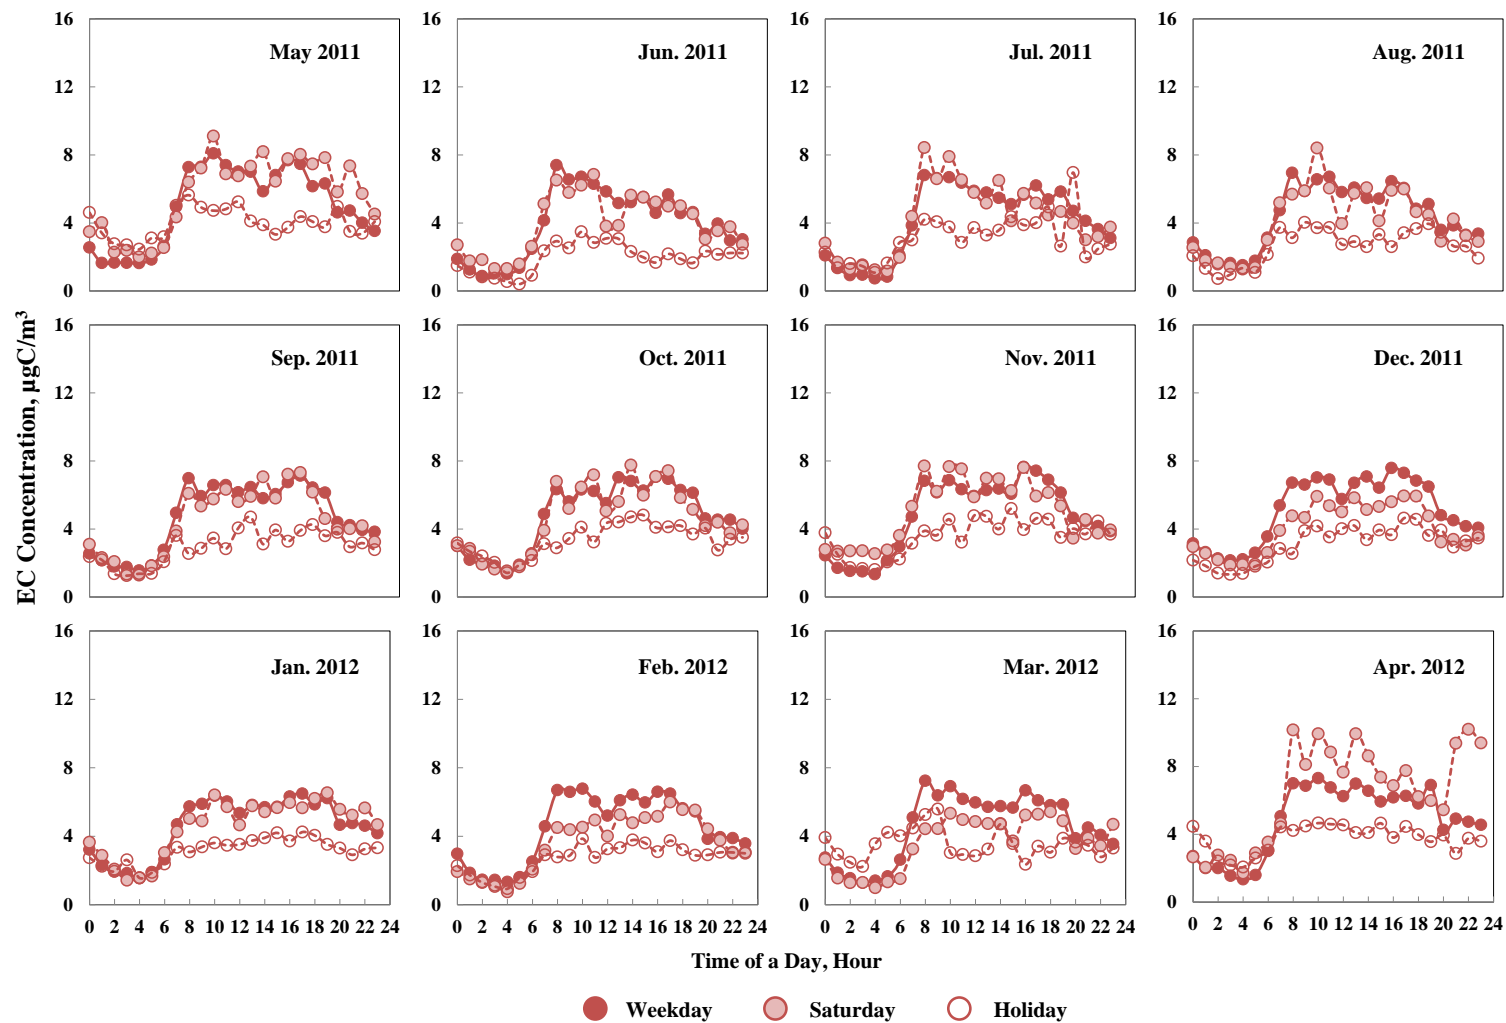

**Figure S2.** Diurnal variations of EC ( $\mu\text{gC}/\text{m}^3$ ) for weekdays, Saturdays and holidays at MK AQMS during the study period.

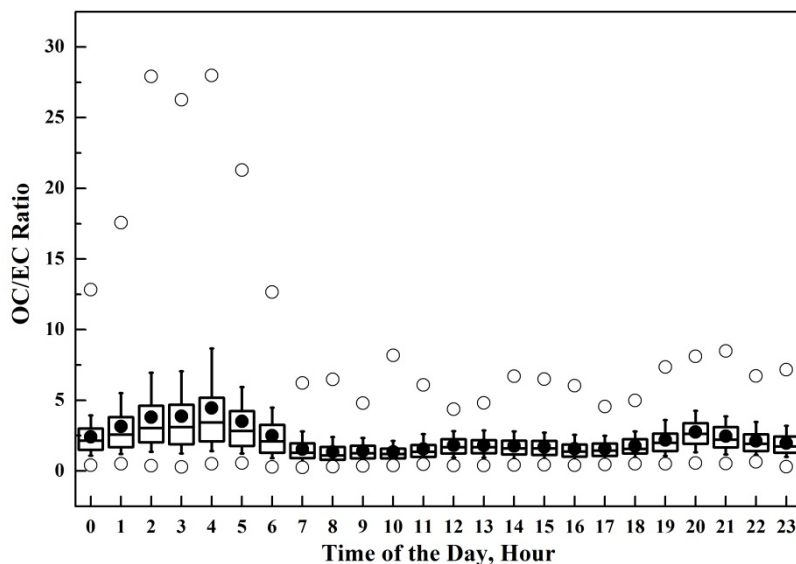

**Figure S3.** The diurnal variation of averaged OC/EC ratios. (The box length: the 25<sup>th</sup> and the 75<sup>th</sup> percentiles; the whiskers: the 10<sup>th</sup> and the 90<sup>th</sup> percentiles; the dot in the box: the average; the line in the box: the median; the circles: the minimum and maximum values).

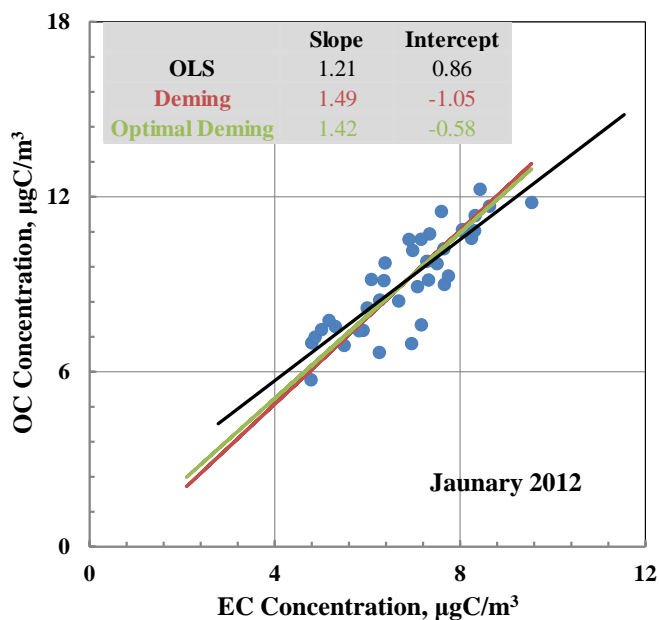

**Figure S4.** Regression lines of 5% lowest (OC/EC) data ( $n = 38$ ) for January 2012 by ordinary least squares (OLS), default Deming, and optimal Deming regression.



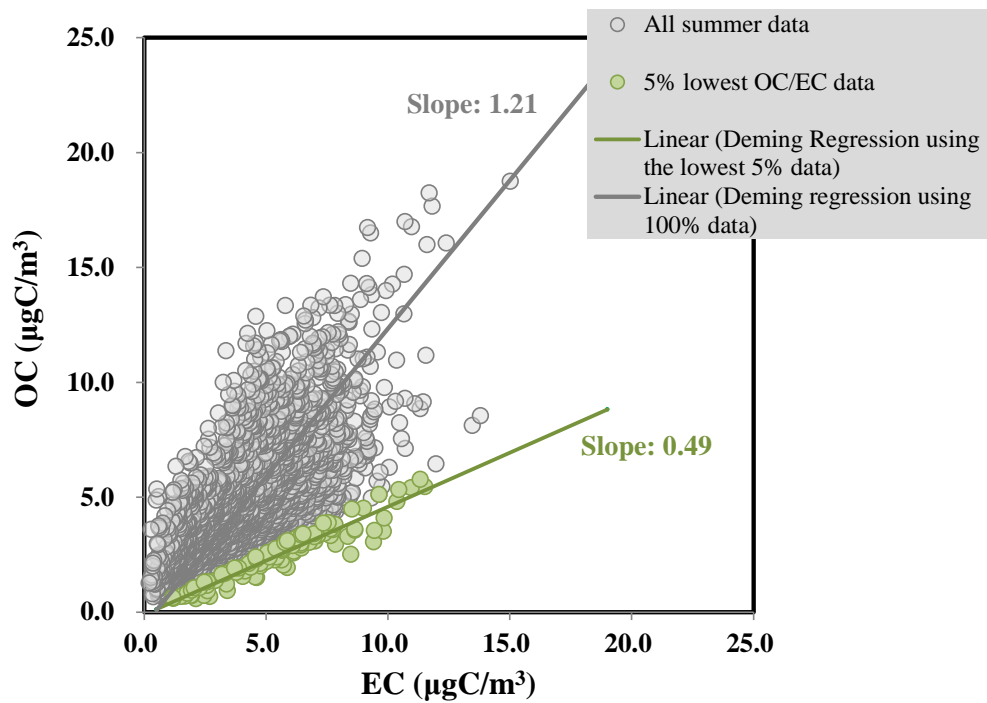

**Figure S5.** Deming regression results of the lowest 5% summer data by OC-to-EC ratio and all summer data.
